# Supplementary material for: Characterization of Enrichment Cultures of Anammox, Nitrifying and Denitrifying Bacteria Obtained from a Cold, Heavily Nitrogen-Polluted Aquifer
Source: MDPI journal article supplement (doi:10.3390/biology12020221), 2023-01-30
Supplement: s1 [file s1]

## Supplementary

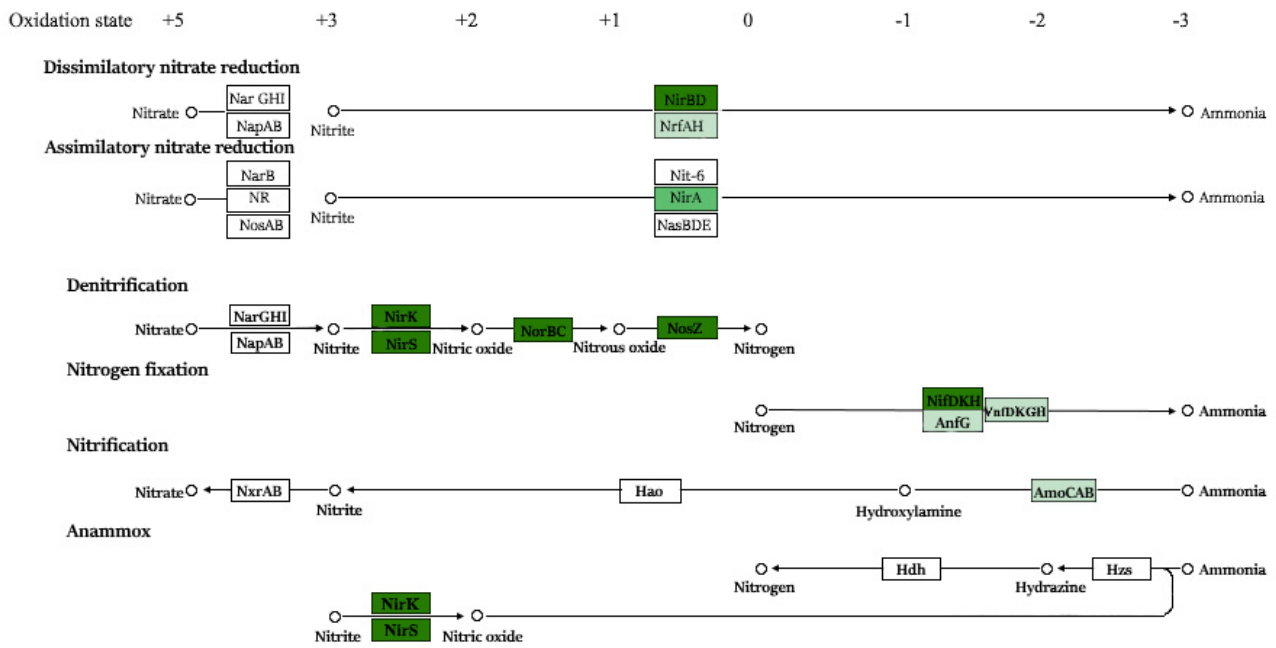

A

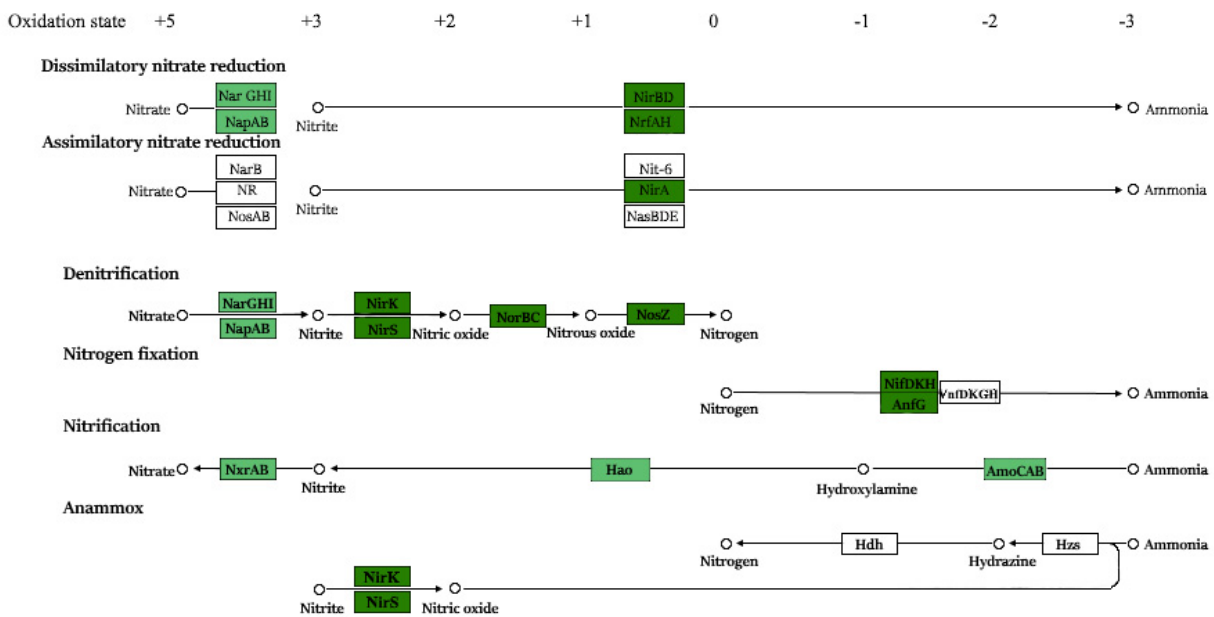

B

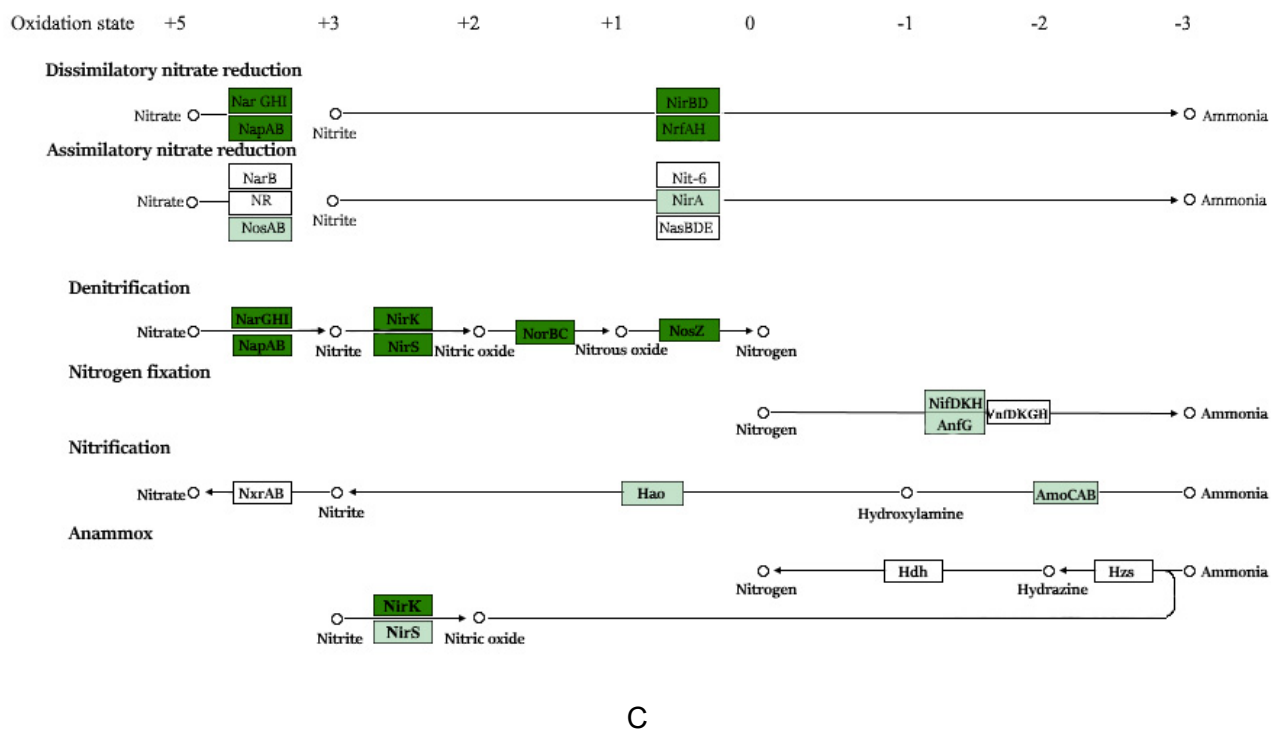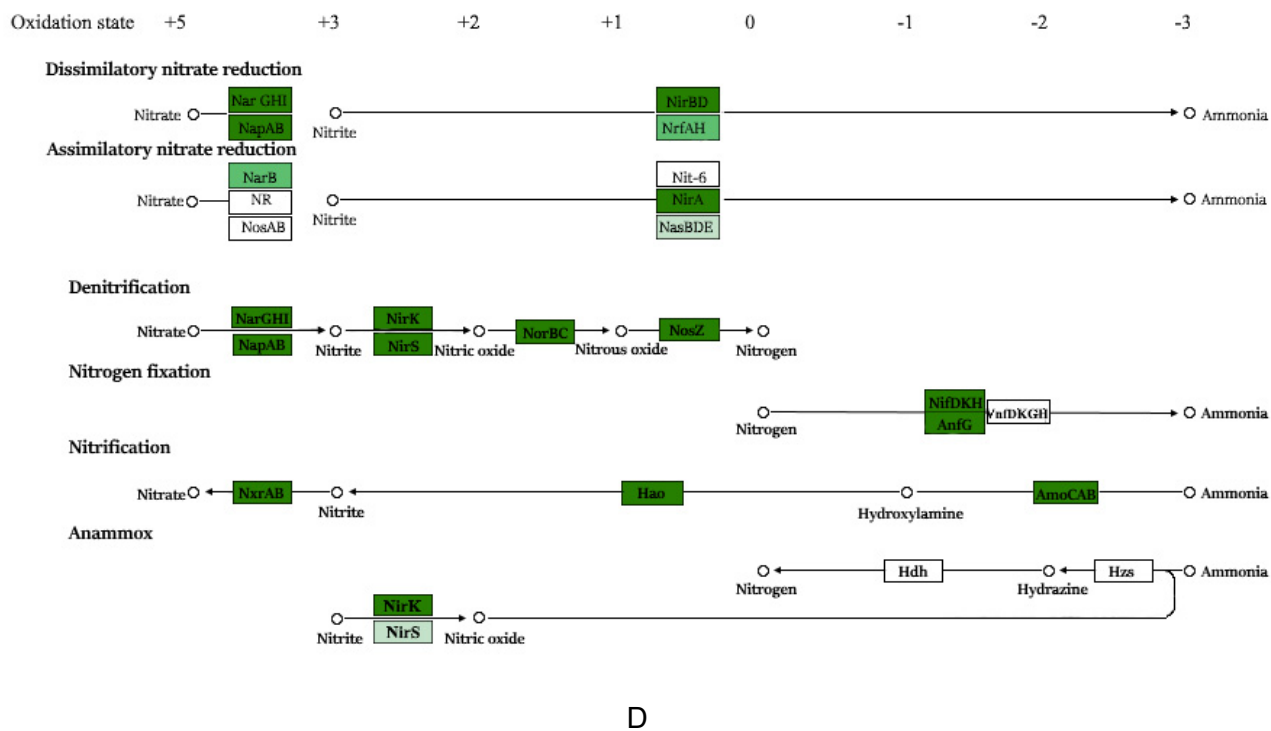

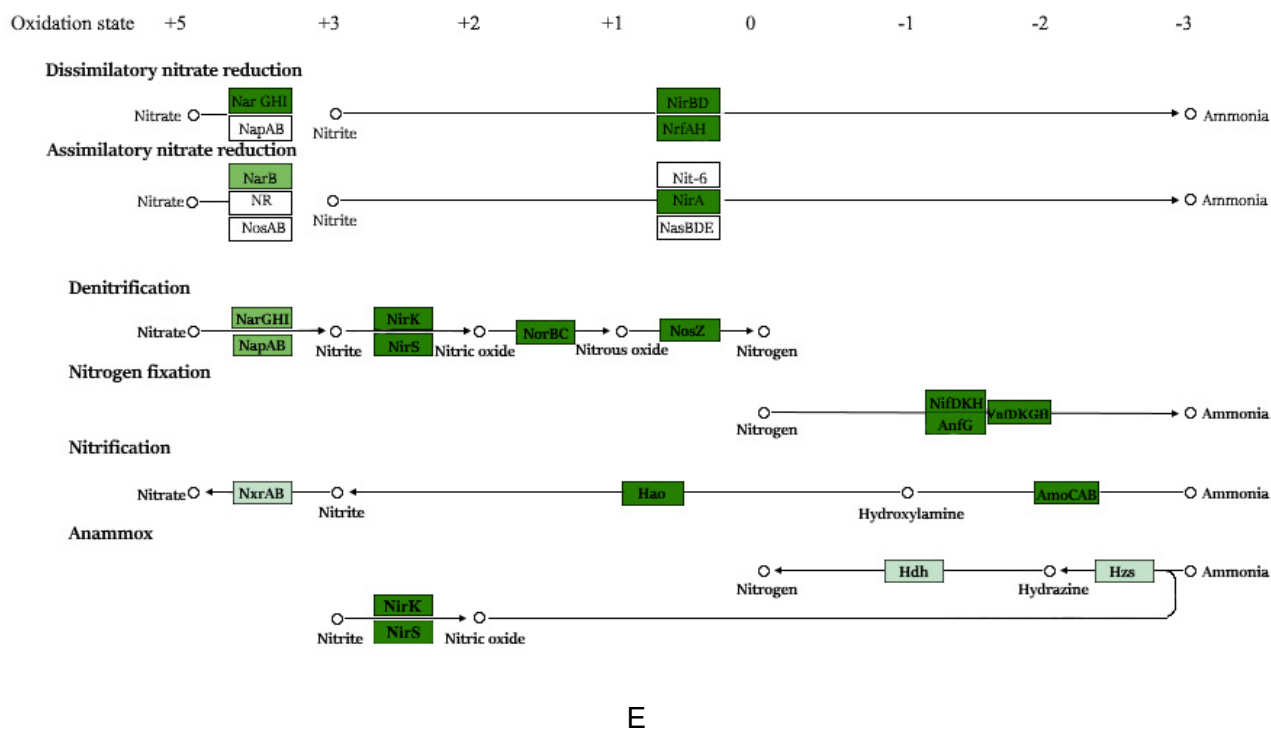

**Figure S1.** Nitrogen metabolic pathways in fed-batch enrichment cultures and continuous-flow cultivated ABR performed by IVICODAK [83]: (A) AOB, (B) NOB, (C) DB, (D) AnAOB, (E) ABR.

**Table S1.** The number of gene copies of key N cycle bacteria in phase 4 of the ABR operation.

| Gene                | Number of copies (per 1 mL)   |
|---------------------|-------------------------------|
| anammox 16S rRNA    | $(2.41 \pm 0.11) \times 10^2$ |
| nirS (denitrifiers) | $(1.07 \pm 0.12) \times 10^8$ |
| nirK (denitrifiers) | $(9.91 \pm 0.41) \times 10^4$ |
| AOB                 | $(1.22 \pm 0.37) \times 10^8$ |

**Table S2.** Bacterial taxon representation in the Venn diagram intersections.

| Intersections | Common taxa                                                                                                                                                                                                                                                                                                                                                                                                                                                                                           |
|---------------|-------------------------------------------------------------------------------------------------------------------------------------------------------------------------------------------------------------------------------------------------------------------------------------------------------------------------------------------------------------------------------------------------------------------------------------------------------------------------------------------------------|
| <b>A</b>      | <i>Mycobacteriaceae</i> , <i>Chitinophagaceae</i> , <i>Microscillaceae</i> , <i>Crocinitomicaceae</i> , <i>NS9 marine group</i> , <i>Weeksellaceae</i> , <i>NS11-12 marine group</i> , <i>Ignavibacteriaceae</i> , <i>A4b</i> , <i>Babeliaceae</i> , <i>Gemmatimonadaceae</i> , <i>Gemmataceae</i> , <i>Isosphaeraceae</i> , <i>Pirellulaceae</i> , <i>Beijerinckiaceae</i> , <i>Hyphomicrobiaceae</i> , <i>Leptospiraceae</i> , <i>Chthoniobacteraceae</i> , <i>Terrimicrobiaceae</i> , <i>WPS-2</i> |
| <b>B</b>      | <i>Flavobacteriaceae</i> , <i>B1-7BS</i> , <i>Methylophilaceae</i> , <i>TRA3-20</i> , <i>Pedosphaeraceae</i>                                                                                                                                                                                                                                                                                                                                                                                          |
| <b>C</b>      | <i>Ferroplasmaceae</i> , <i>Ferrovibrionaceae</i> , <i>Oceanibaculaceae</i>                                                                                                                                                                                                                                                                                                                                                                                                                           |

|          |                                                                                                                                                                                                                                                                                                                                                                                                                                                                                                                                                                                                               |
|----------|---------------------------------------------------------------------------------------------------------------------------------------------------------------------------------------------------------------------------------------------------------------------------------------------------------------------------------------------------------------------------------------------------------------------------------------------------------------------------------------------------------------------------------------------------------------------------------------------------------------|
| <b>D</b> | <i>Blastocatellaceae, Streptomycetaceae, Bacteroidaceae, Bacteroidales RF16 group, F082, Prevotellaceae, Rikenellaceae, Nitrososphaeraceae, Gastranaerophilales, Thermaceae Desulfovibrionaceae, Methanobacteriaceae, Acholeplasmataceae, Acidaminococcaceae, Butyricococcaceae, Christensenellaceae, Erysipelotrichaceae, Ethanoligenenaceae, Hungateiclostridiaceae, Lachnospiraceae, Monoglobaceae, Ruminococcaceae, Halanaerobiaceae, Woesearchaeales, Acetobacteraceae, Acidiferrobacteraceae, Methanomethylophilaceae, Thermoplasmataceae, Petrotogaceae, Akkermansiaceae, Victivallaceae, WCHB1-41</i> |
| <b>E</b> | <i>Carnobacteriaceae, Clostridiaceae, Dysgonomonadaceae, Sedimentibacteraceae, Tannerellaceae</i>                                                                                                                                                                                                                                                                                                                                                                                                                                                                                                             |
| <b>F</b> | <i>Xanthobacteraceae, Burkholderiaceae, Nitrosomonadaceae, Rhodocyclaceae</i>                                                                                                                                                                                                                                                                                                                                                                                                                                                                                                                                 |
| <b>G</b> | <i>Comamonadaceae, Rhodanobacteraceae</i>                                                                                                                                                                                                                                                                                                                                                                                                                                                                                                                                                                     |
| <b>H</b> | <i>Alcaligenaceae</i>                                                                                                                                                                                                                                                                                                                                                                                                                                                                                                                                                                                         |
| <b>I</b> | <i>Rhizobiaceae</i>                                                                                                                                                                                                                                                                                                                                                                                                                                                                                                                                                                                           |
| <b>J</b> | <i>Caulobacteraceae</i>                                                                                                                                                                                                                                                                                                                                                                                                                                                                                                                                                                                       |
| <b>K</b> | <i>Pseudomonadaceae</i>                                                                                                                                                                                                                                                                                                                                                                                                                                                                                                                                                                                       |
| <b>L</b> | <i>Oscillospiraceae, UCG-010, Sphingomonadaceae</i>                                                                                                                                                                                                                                                                                                                                                                                                                                                                                                                                                           |
| <b>M</b> | <i>Devosiaceae</i>                                                                                                                                                                                                                                                                                                                                                                                                                                                                                                                                                                                            |
| <b>N</b> | <i>Hydrogenophilaceae</i>                                                                                                                                                                                                                                                                                                                                                                                                                                                                                                                                                                                     |

**Table S3.** Major metabolic pathways in dominant microbial groups (according to KEGG database <https://www.genome.jp/>)

| dominant taxa                                            | Dissimilatory nitrate reduction    | Denitrification to N <sub>2</sub>   | Assimilatory nitrate reduction     | Nitrite reduction                  | N <sub>2</sub> fixation | Anaerobic ammonium oxidation |
|----------------------------------------------------------|------------------------------------|-------------------------------------|------------------------------------|------------------------------------|-------------------------|------------------------------|
| <b>Pseudomonadaceae, g:Pseudomonas</b>                   | +                                  | +                                   | +                                  | +                                  | -                       | -                            |
| <b>Rhodanobacteraceae</b>                                | NO <sub>2</sub> to NH <sub>4</sub> | NO <sub>2</sub> to N <sub>2</sub> O | NO <sub>3</sub> to NO <sub>2</sub> | -                                  | +                       | -                            |
| <b>Hydrogenophilaceae</b>                                | +                                  | NO <sub>2</sub> to N <sub>2</sub> O | NO <sub>3</sub> to NH <sub>4</sub> | NH <sub>4</sub> to hydroxylamine   | -                       | -                            |
| <b>Nitrososphaeraceae</b>                                | +                                  | NO <sub>2</sub> to NO               | +                                  | +                                  | -                       | -                            |
| <b>Butyricococcaceae</b>                                 | -                                  | -                                   | +                                  | -                                  | -                       | -                            |
| <b>Xanthomonadaceae, g:Thermomonas, Stenotrophomonas</b> | NO <sub>3</sub> to NO <sub>2</sub> | NO <sub>3</sub> to N <sub>2</sub> O | +                                  | NO <sub>2</sub> to NO <sub>3</sub> | -                       | -                            |
| <b>Rhizobiaceae, g:Aminobacter</b>                       | NO <sub>3</sub>                    | +                                   | +                                  | +                                  | +                       | -                            |

|                                       |                                       |                                        |                                       |   |   |   |
|---------------------------------------|---------------------------------------|----------------------------------------|---------------------------------------|---|---|---|
|                                       | to NH <sub>4</sub>                    |                                        |                                       |   |   |   |
| <b>Sphingomonadaceae</b>              | -                                     | -                                      | NO <sub>3</sub><br>to NH <sub>4</sub> | - | - | - |
| <b>Oscillospiraceae</b>               | -                                     | -                                      | -                                     | - | + | - |
| <b>Rikenellaceae</b>                  | -                                     | -                                      | +                                     | - | - | - |
| <b>Bacteroidaceae</b>                 | NO <sub>2</sub><br>to NH <sub>4</sub> | -                                      | +                                     | + | - | - |
| <b>Alcaligenaceae, g:Pusillimonas</b> | NO <sub>3</sub><br>to NH <sub>4</sub> | NO <sub>2</sub> to<br>N <sub>2</sub> O | NO <sub>3</sub><br>to NO <sub>2</sub> | + | - | - |
| <b>Clostridiaceae</b>                 | +                                     | -                                      | +                                     | - | + | - |
| <b>Carnobacteriaceae</b>              | -                                     | -                                      | +                                     | - | - | - |

Note: + means presence, - means absence or unknown
